# Supplementary material for: Novel Calibration Approach for Monitoring Aerosol Hydrogen Isotopes Using Laser-Induced Breakdown Spectroscopy for Molten Salt Reactor Off-Gas Streams
Source: MDPI journal article supplement (doi:10.3390/s23249797), 2023-12-13
Supplement: s1 [file s1]

Article

# Novel Calibration Approach for Monitoring Aerosol Hydrogen Isotopes Using Laser-Induced Breakdown Spectroscopy for Molten Salt Reactor Off-Gas Streams

Hunter B. Andrews<sup>1\*</sup> and Joanna McFarlane<sup>2</sup>

<sup>1</sup> Radioisotope Science and Technology Division, Oak Ridge National Laboratory, 1 Bethel Valley Road, Oak Ridge, TN 37831, USA

<sup>2</sup> Nuclear Energy and Fuel Cycle Division, Oak Ridge National Laboratory, 1 Bethel Valley Road, Oak Ridge, TN 37831, USA

\* Correspondence: andrewshb@ornl.gov

## Supplementary Information

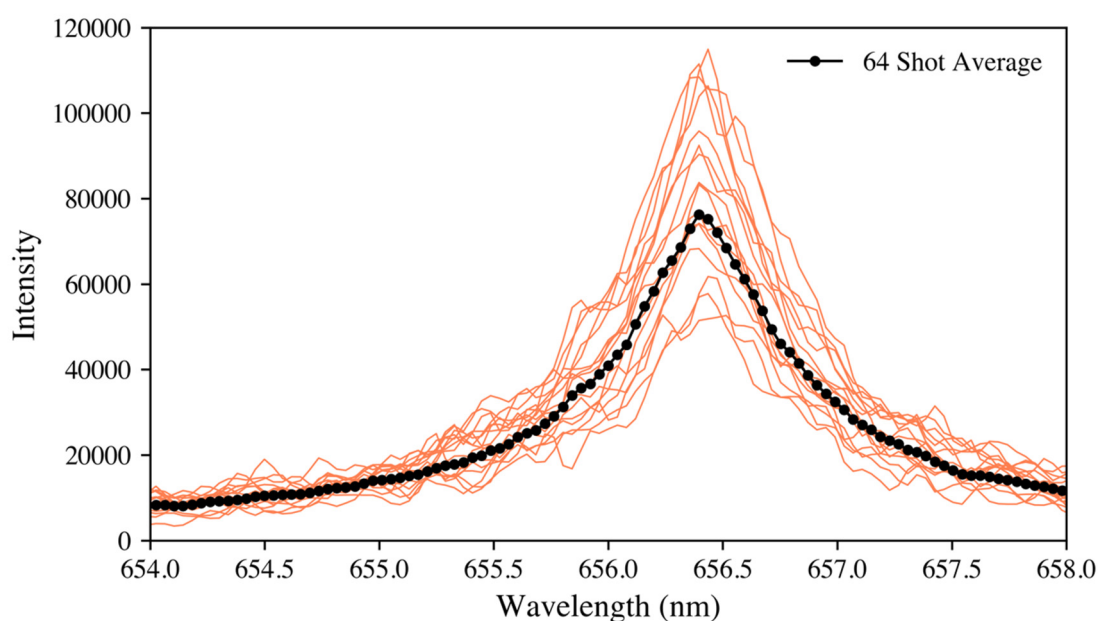

**Figure S1.** Single-shot spectra versus 64-shot average spectrum of 0% D<sub>2</sub>O used to better resolve peak center.

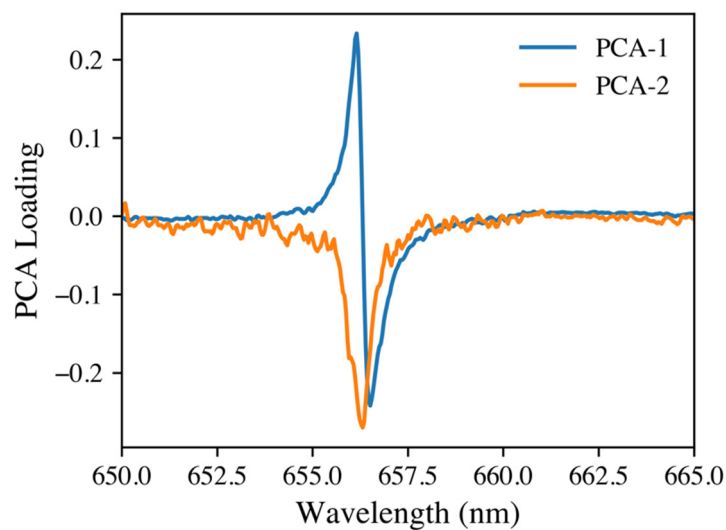

**Figure S2.** PCA loadings for hydrogen isotope shifts measured on the echelle spectrometer.

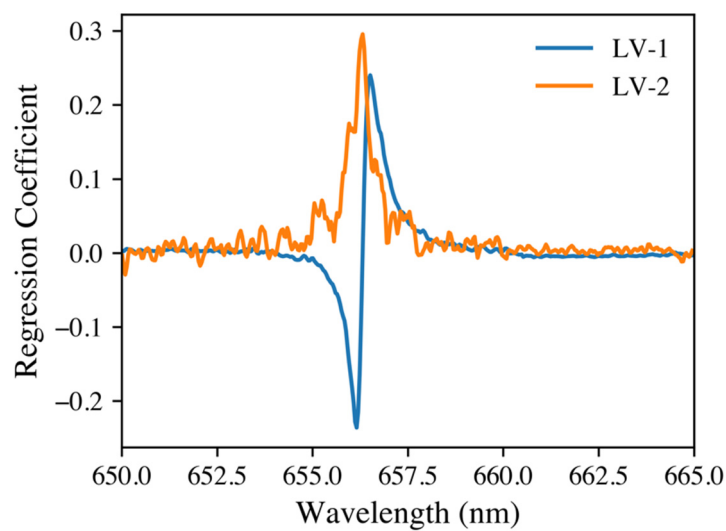

**Figure S3.** PLSR regression coefficients for hydrogen isotope shifts measured on the echelle spectrometer.

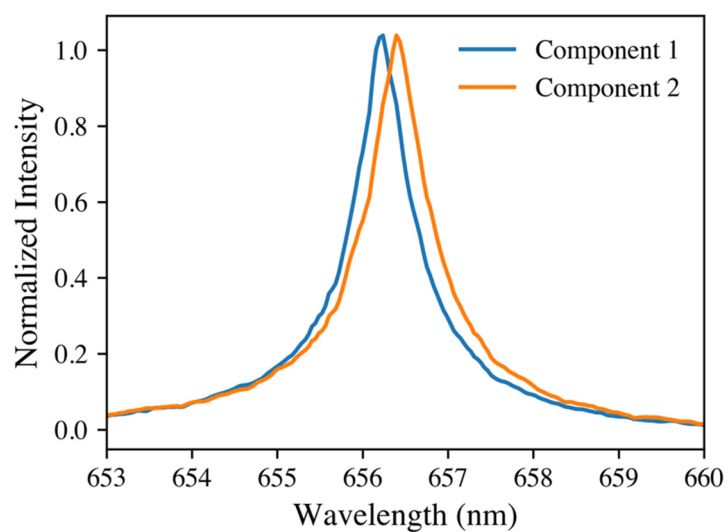

**Figure S4.** MCR pure spectral components for hydrogen isotope shifts measured on the echelle spectrometer.

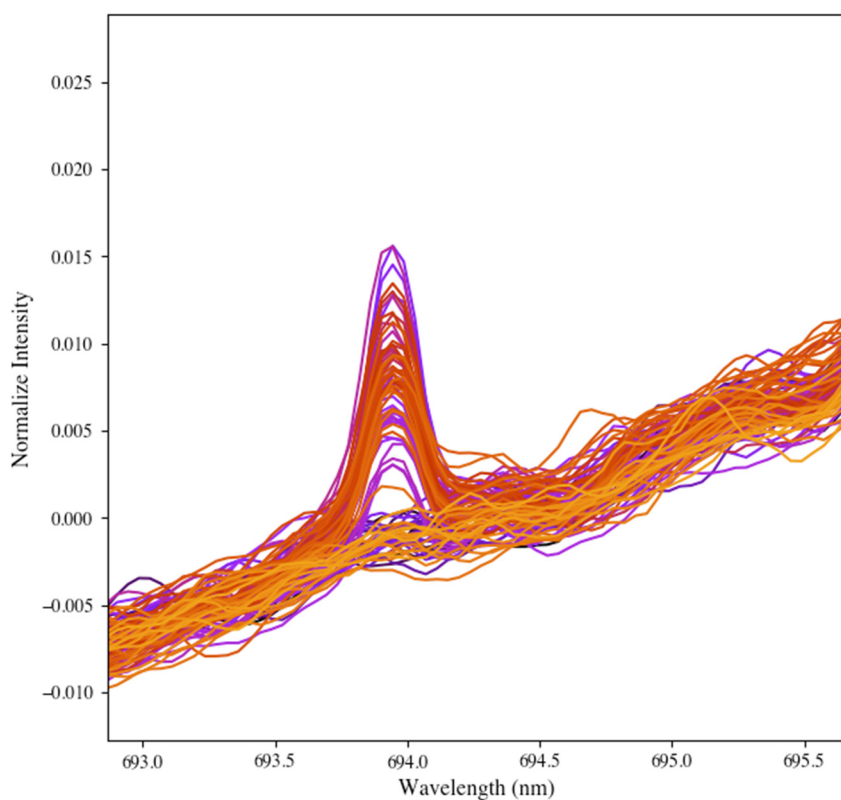

**Figure S5.** Potassium 693.3 nm emission over the duration of the real-time tests.
